# Supplementary material for: The influence of the ocean circulation state on ocean carbon storage and CO 2 drawdown potential in an Earth system model
Source: Copernicus journal article supplement (doi:10.5194/bg-15-1367-2018), 2018-03-06
Supplement: Supplementary file 1 [file bg-15-1367-2018-supplement.pdf]

Supplement of Biogeosciences, 15, 1367–1393, 2018  
<https://doi.org/10.5194/bg-15-1367-2018-supplement>  
© Author(s) 2018. This work is distributed under  
the Creative Commons Attribution 3.0 License.

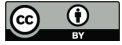

*Supplement of*

## **The influence of the ocean circulation state on ocean carbon storage and CO<sub>2</sub> drawdown potential in an Earth system model**

**Malin Ödalen et al.**

*Correspondence to:* Malin Ödalen (malin.odalen@misu.su.se)

The copyright of individual parts of the supplement might differ from the CC BY 3.0 License.

## S Supplementary material

This document includes supplementary figures and tables, containing data that is described or shown in other forms in the manuscript. Table S.1 lists the maxima and minima in ocean overturning streamfunction,  $\psi$ , that are used to calculate ( $OVT$ ) in Tables 3 and 4 and Figures 3 and 4. Figure S.1 shows the changes in  $T_{avg}$  for the  $SE$  ensemble, with respect to the control simulation  $PIES278$ , versus the change in  $pCO_2^{atm}$  that is estimated to result from the corresponding change in  $C_{sat,T}$  using the two different methods described in Appendix C. The sections in Figure S.2 show changes in temperature ( $\Delta T$ ) for ensemble members  $DDx2$  and  $DD/2$  and different basins.

**Table S.1.** Minimum (*min*) and maximum (*max*) of zonal average ocean overturning streamfunction,  $\psi$  [Sv], below 556 m for each ensemble member (*Ens. mem.*) for the Atlantic and Pacific basin, as well as for the Northern and Southern hemispheres.

| Ens.<br>mem. | Atlantic<br>min | Atlantic<br>max | Pacific<br>min | Pacific<br>max | N. Hem<br>min | N. Hem<br>max | S. Hem<br>min | S. Hem<br>max |
|--------------|-----------------|-----------------|----------------|----------------|---------------|---------------|---------------|---------------|
| PIES278      | -0.72994        | 14.351          | -10.622        | 0.82759        | -3.0596       | 13.969        | -8.5206       | 16.109        |
| WSx2         | -2.2848         | 17.18           | -12.118        | 5.1812         | -5.4032       | 19.826        | -9.61         | 37.308        |
| WS/2         | -0.8106         | 12.208          | -10.614        | -0.0054238     | -1.1717       | 11.73         | -9.8906       | 6.0054        |
| ADx2         | -1.7676         | 13.393          | -10.431        | 0.19119        | -4.6907       | 13.037        | -10.125       | 14.205        |
| AD/2         | -0.90637        | 13.343          | -9.5614        | 0.67199        | -3.289        | 12.758        | -7.821        | 17.496        |
| DDx2         | -1.5467         | 18.001          | -14.518        | 2.8046         | -6.0425       | 17.998        | -14.648       | 12.872        |
| DD/2         | -0.9551         | 12.01           | -8.216         | 0.35484        | -2.5218       | 11.695        | -5.685        | 17.737        |
| IDx2         | -0.69754        | 10.881          | -10.634        | 1.2097         | -2.2037       | 10.584        | -8.3644       | 21.294        |
| ID/2         | -1.2487         | 16.588          | -9.3395        | 0.80844        | -3.6345       | 16.071        | -8.73         | 11.925        |
| WS/2_DD/2    | -0.55727        | 3.5649          | -6.7039        | 0.6078         | -3.3234       | 2.4071        | -7.6655       | 7.3873        |
| ADx2_DDx2    | -2.5161         | 15.909          | -13.521        | 0.92228        | -7.613        | 15.614        | -15.484       | 11.301        |
| DDx2_IDx2    | -1.0229         | 14.554          | -15.156        | 2.4531         | -4.9616       | 15.176        | -14.387       | 18.074        |
| DD/2_IDx2    | -0.58072        | 8.6163          | -7.7396        | 0.63172        | -1.956        | 7.9347        | -5.4419       | 22.768        |

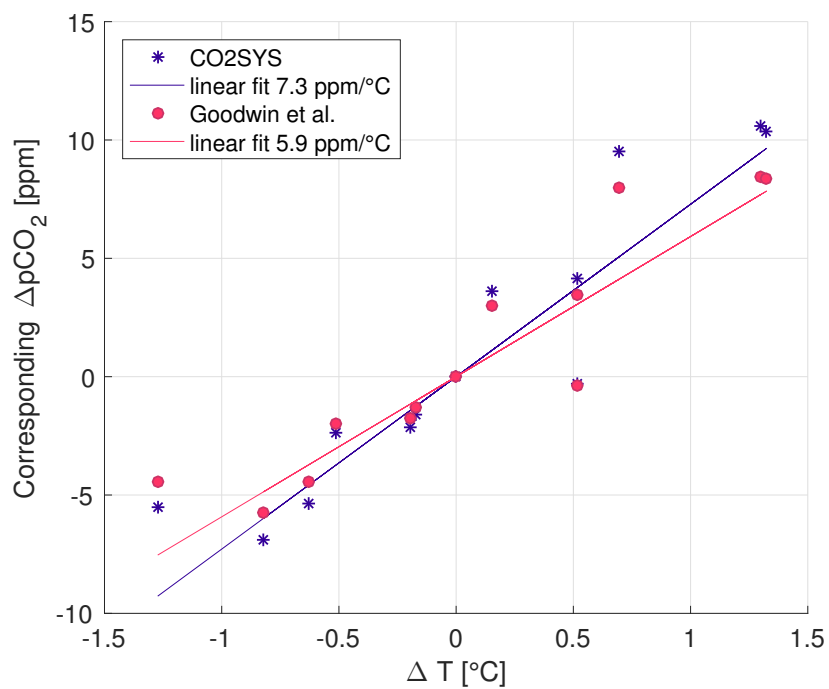

**Figure S.1.** Global ocean average temperature change ( $\Delta T_{avg}$ ) and the changes in  $pCO_2^{atm}$  corresponding to the  $\Delta C_{sat,T}$  caused by the changes in temperature in the ensemble members  $SE1 - SE12$ . The control state is found at coordinates (0,0). The scattered behaviour is due to the temperature restriction on the solubility constants.

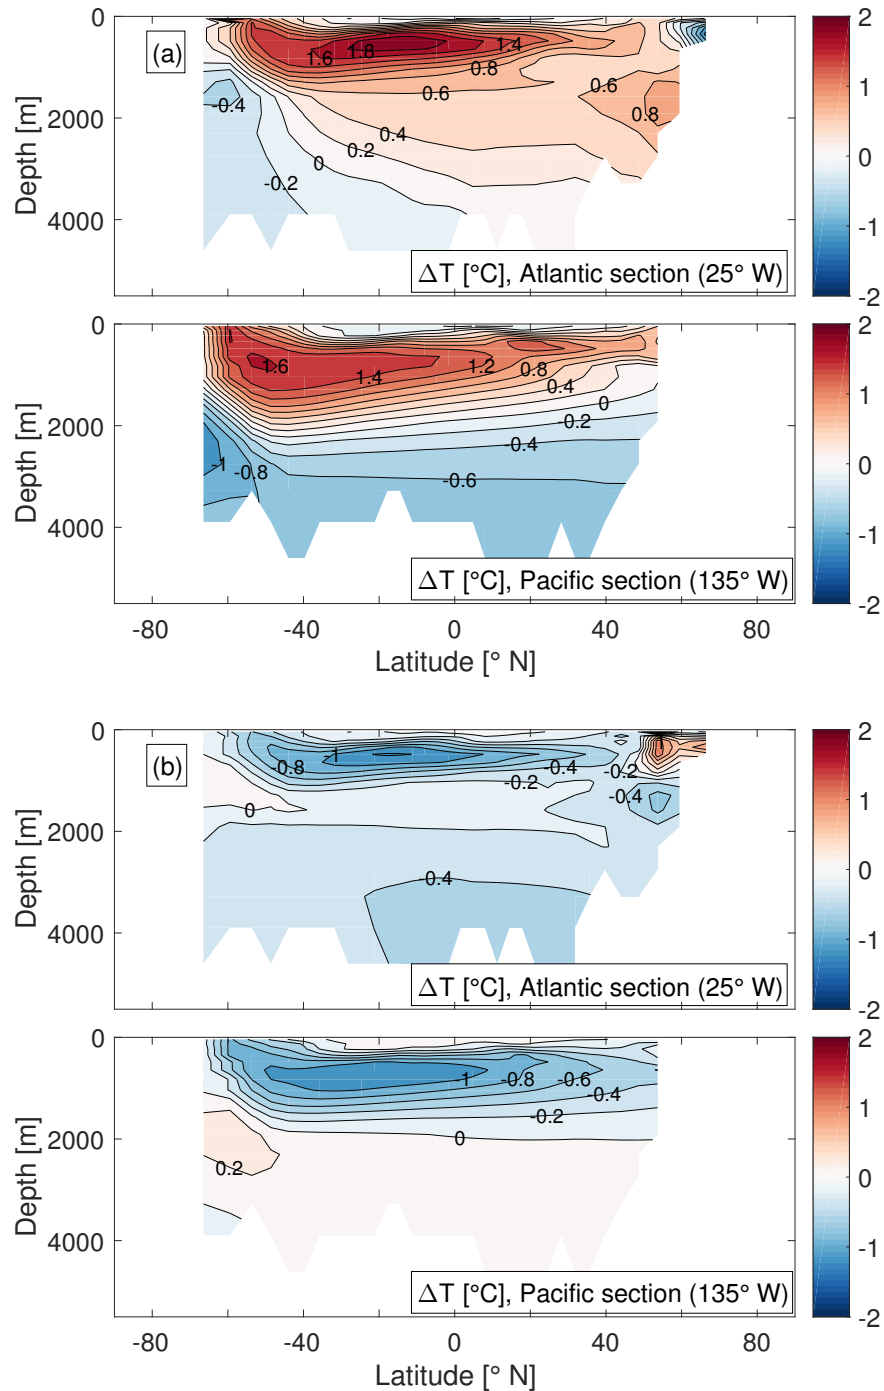

**Figure S.2.** Changes in ocean temperature ( $\Delta T$ , [ $^{\circ}$  C]), with respect to the control state *PIES278*, for a) *DDx2*, with high diapycnal diffusivity, b) *DD/2*, with low diapycnal diffusivity. The upper panel of each subfigure shows a section through the Atlantic, at  $25^{\circ}$  W and the lower panel shows a section through the Pacific, at  $135^{\circ}$  W. Both sections also cover latitudes that are in the Southern Ocean (south of  $-30^{\circ}$  N).
